# Supplementary material for: Lipocalin 2 deactivates macrophages and worsens pneumococcal pneumonia outcomes
Source: JCI journal article supplement (doi:10.1172/jci67911), 2013-06-30
Supplement: sd1 [file 1]

## **Supplemental Information**

### **Lipocalin-2 deactivates macrophages and worsens pneumococcal pneumonia outcomes**

Joanna M. Warszawska<sup>1,2</sup>, Riem Gawish<sup>1,2</sup>, Omar Sharif<sup>1,2</sup>, Stefanie Sigel<sup>1,2</sup>, Bianca Doninger<sup>1,2</sup>, Karin Lakovits<sup>2</sup>, Ildiko Mesteri<sup>3</sup>, Manfred Nairz<sup>4</sup>, Louis Boon<sup>5</sup>, Alexander Spiel<sup>6</sup>, Valentin Fuhrmann<sup>6</sup>, Birgit Strobl<sup>7</sup>, Mathias Müller<sup>7</sup>, Peter Schenk<sup>6</sup>, Günter Weiss<sup>4</sup>, Sylvia Knapp<sup>1,2</sup>

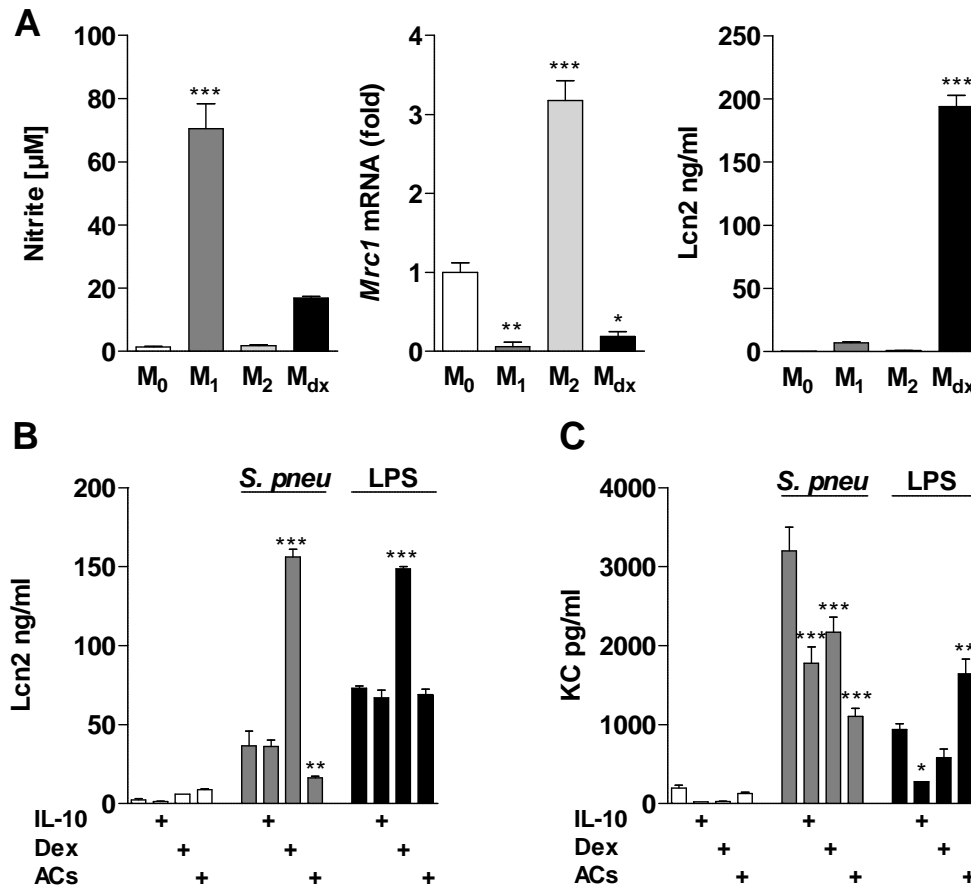

### Supplemental Figure 1

Lcn2 is highly expressed in deactivated macrophages. **(A)** MH-S cells were polarized with  $M_1$  (100ng/ml LPS, 200U/ml  $IFN\gamma$ ),  $M_2$  (10ng/ml IL-13, 10ng/ml IL-4) or deactivating ( $M_{dx}$ ; 10ng/ml LPS, 100 $\mu$ M dexamethasone) stimuli for 24h. Nitrite concentration was measured in supernatants and *Mrc1* expression was determined by qRT-PCR. Lcn2 release was assessed in supernatants by ELISA. The mRNA expression data were normalized to HPRT and expressed as a fold change compared to  $M_0$  control cells. **(B, C)** BMDM were treated with  $4 \times 10^7$  CFU/ml *S. pneumoniae* (grey bars) or 10ng/ml LPS (black bars) alone or in combination with indicated deactivating stimuli (10ng/ml IL-10, 100 $\mu$ M dexamethasone (Dex), or  $10^7$ /ml apoptotic cells (ACs)) for 16h. Secretions of Lcn2 **(B)** and KC **(C)** were assessed in supernatants by ELISA. Data are presented as mean  $\pm$  SEM of triplicate **(A)** or quadruplicate **(B, C)** data and representative of at least two independent experiments. \*/ \*\*/ \*\*\* indicate  $P < 0.05$ /  $P < 0.001$ /  $P < 0.0001$  versus  $M_0$  **(A)** or versus respective conditions without deactivating stimuli **(B, C)** (ANOVA).

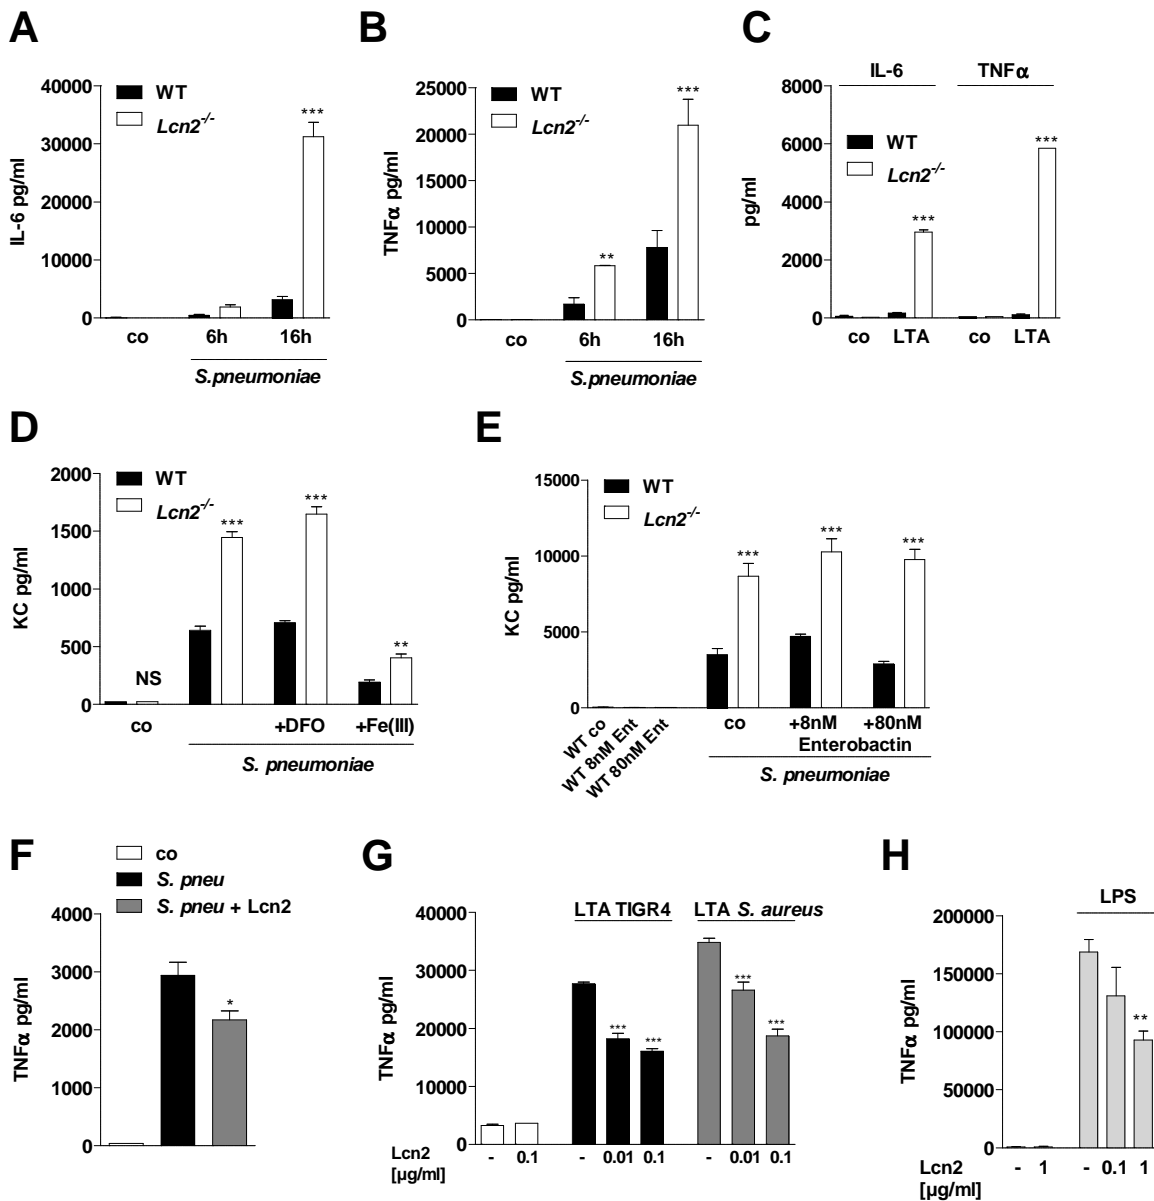

## Supplemental Figure 2

Lcn2 deactivates macrophages. (A-C) WT (black bars) and *Lcn2*<sup>-/-</sup> (white bars) BMDM were stimulated with  $4 \times 10^7$  CFU/ml *S. pneumoniae* for 6 and 16h (A,B) or 10μg/ml LTA from *S. aureus* for 16h (C). IL-6 (A,C) and TNFα (B,C) were measured in supernatants by ELISA. (D, E) BMDM from WT (black bars) and *Lcn2*<sup>-/-</sup> mice (white bars) were exposed to  $4 \times 10^7$  CFU/ml *S. pneumoniae* in the presence or absence of (D) 50μM deferoxamine (DFO) or 50μM Fe (III) ammonium citrate for 6h or (E) 8-80nM enterobactin for 16h. KC was assessed in supernatants by ELISA. (F) Primary WT AM were treated with  $4 \times 10^7$  CFU/ml *S. pneumoniae* with or without 100ng/ml Lcn2 for 16h. TNFα levels were quantified in supernatants by ELISA. (G, H) MH-S cells were stimulated with 10μg/ml LTA from *S. pneumoniae* (TIGR4), 10μg/ml LTA from *S. aureus* (G) or 1μg/ml LPS (H) with or without increasing doses of Lcn2 (0.01μg/ml-0.1μg/ml (G); 0.1-1μg/ml (H)). TNFα was measured after 16h by ELISA. All data are presented as mean ± SEM of quadruplicates and representative of two independent experiments. NS, not significant; \*/ \*\*/ \*\*\* indicate  $P < 0.05$ /  $P < 0.001$ /  $P < 0.0001$  compared to respective WT condition (A-E) (ANOVA), *S. pneumoniae* (F) (t test), or respective condition without addition of Lcn2 (G, H) (ANOVA).

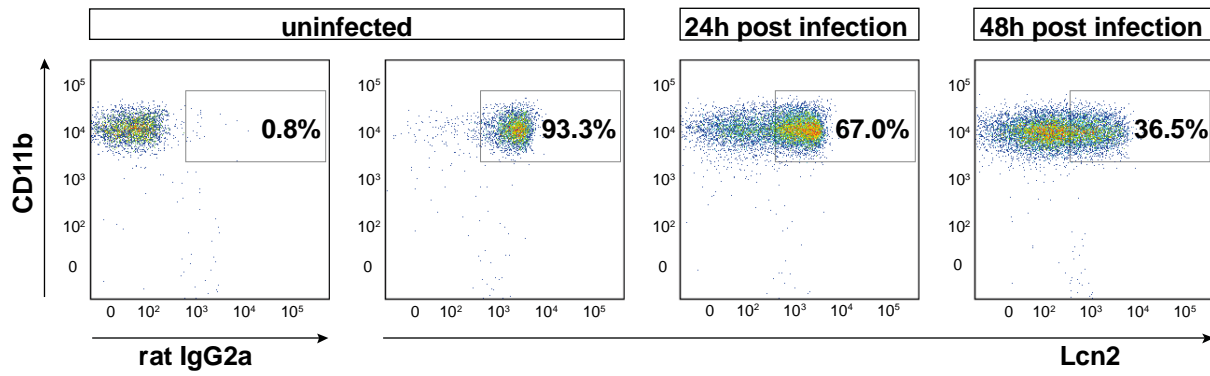

### Supplemental Figure 3

Neutrophils release Lcn2 during pneumococcal pneumonia.

WT mice were infected with 10<sup>5</sup> CFU *S. pneumoniae*. CD45<sup>+</sup> Ly6G<sup>+</sup> CD11b<sup>+</sup> cells were analyzed by flow cytometry for intracellular Lcn2 expression.

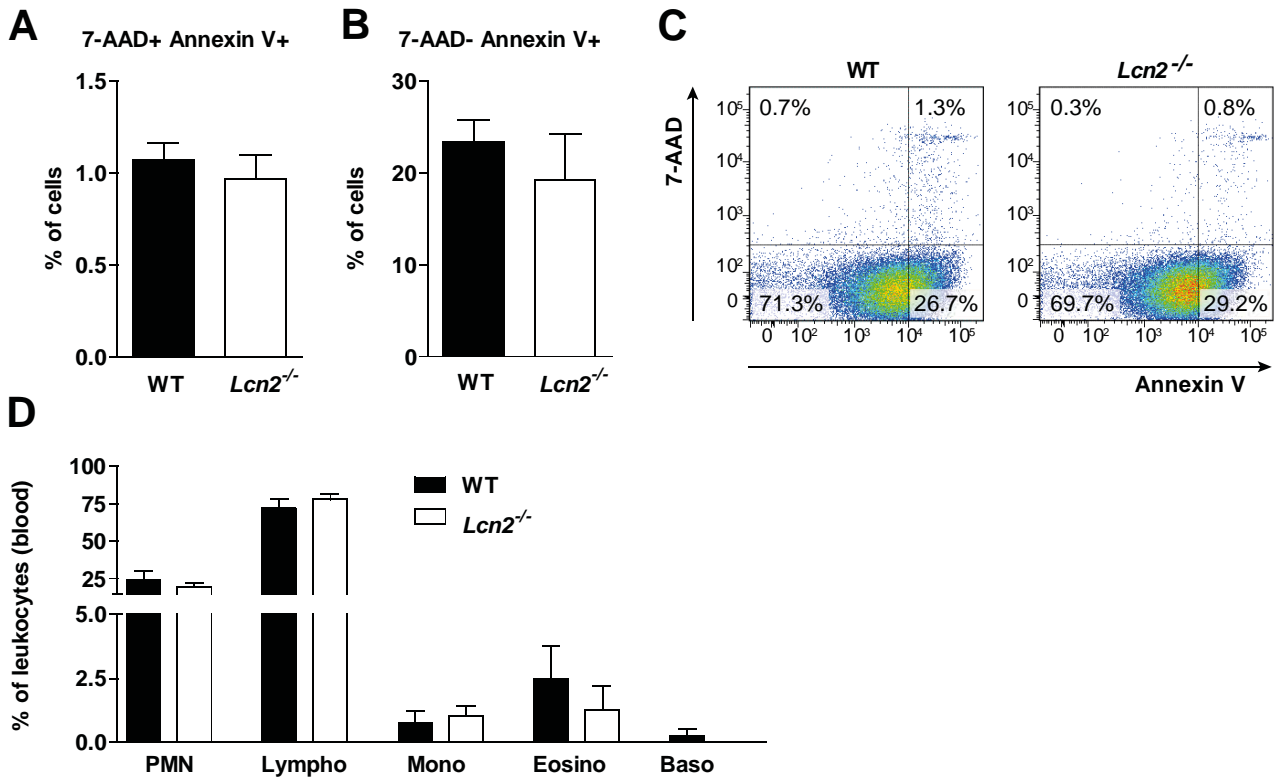

#### Supplemental Figure 4

Apoptosis and a-priori white blood cell counts are similar in WT and *Lcn2*<sup>-/-</sup> mice.

(A-C) WT and *Lcn2*<sup>-/-</sup> mice were infected with 10<sup>5</sup> CFU *S. pneumoniae* for 12h. Bronchoalveolar lavage was performed and isolated cells were stained with Annexin-V and 7-AAD. The percentage of 7-AAD and Annexin-V double positive or Annexin-V single positive cells is shown in (A) or (B), respectively. Representative dot plots of WT (left) and *Lcn2*<sup>-/-</sup> (right) lung cells are shown in (C). Data are expressed as mean ± SEM of quadruplicates and representative of two independent experiments. (D) Differential cell counts of blood leukocytes from healthy WT and *Lcn2*<sup>-/-</sup> mice. Data are expressed as mean ± SEM of quadruplicates. PMN – polymorphonuclear cells; Lympho – lymphocytes; Mono – monocytes; Eosino – eosinophils; Baso – basophils.

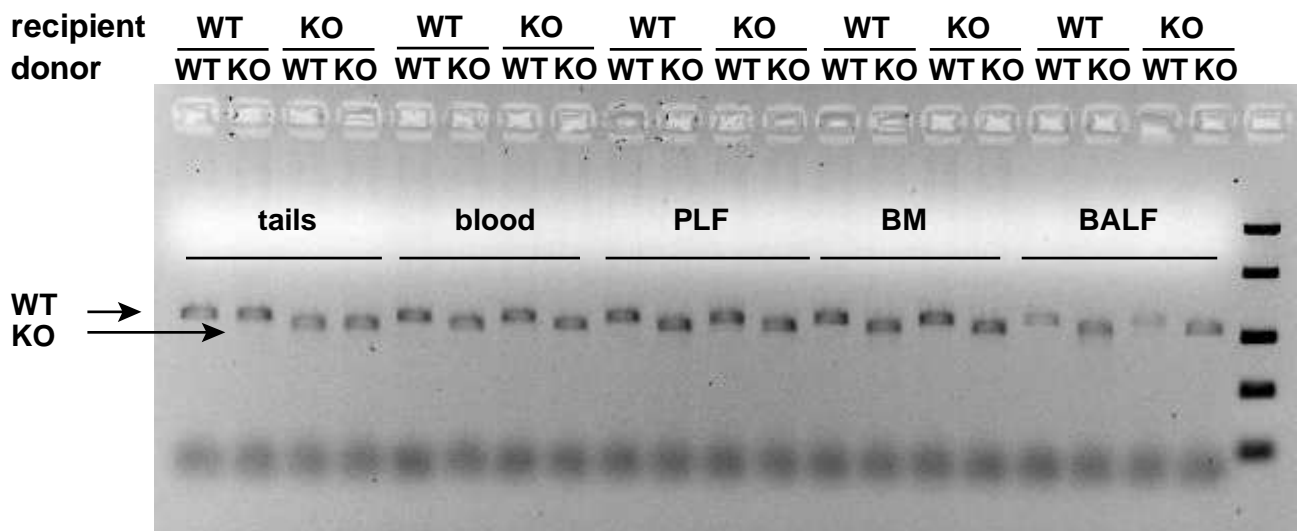

### Supplemental Figure 5

Reconstitution of bone marrow chimeric mice.

WT and KO recipient mice were lethally irradiated and immediately reconstituted with bone marrow from either syngeneic (WT-WT and KO-KO chimeras) or allogeneic donors (WT-KO and KO-WT chimeras). Three months after transplantation, one mouse per group was sacrificed and genomic DNA was isolated from blood cells, peritoneal macrophages (by peritoneal lavage; PLF), bone marrow (BM), alveolar macrophages (by bronchoalveolar lavage (BALF)) and genotyped by PCR. Tail biopsies were tested to ensure proper recipient status. WT-specific PCR products: 471bp, KO specific PCR products: ~450bp.

**Supplemental Table 1:**

| <b>Group</b>                 | <b>Pathogen</b>                          | <b>n</b> |
|------------------------------|------------------------------------------|----------|
| Gram-positive; survivors     | <i>Streptococcus pneumoniae</i>          | 6        |
|                              | <i>Staphylococcus aureus</i>             | 4        |
|                              | <i>Enterococcus faecium</i>              | 2        |
|                              | $\beta$ -haemolysing <i>streptococci</i> | 2        |
|                              |                                          |          |
| Gram-positive; non-survivors | <i>Enterococcus faecalis</i>             | 4        |
|                              | <i>Staphylococcus aureus</i>             | 2        |
|                              |                                          |          |
| Gram-negative; survivors     | <i>Escherichia coli</i>                  | 5        |
|                              | <i>Klebsiella spp.</i>                   | 5        |
|                              | <i>Citrobacter freundii</i>              | 2        |
|                              | <i>Proteus mirabilis</i>                 | 2        |
|                              | <i>Haemophilus influenzae</i>            | 2        |
|                              |                                          |          |
| Gram-negative; non-survivors | <i>Acinetobacter baumannii</i>           | 2        |
|                              | <i>Pseudomonas aeruginosa</i>            | 2        |
|                              | <i>Legionella pneumophila</i>            | 2        |
|                              | <i>Enterobacter cloacae</i>              | 1        |

**Supplemental Table 2: Primer sequences**

| Primer name                                                                                                                                                                                              | Full name                                                                                                                     | Sequence (sense, antisense)                                       |
|----------------------------------------------------------------------------------------------------------------------------------------------------------------------------------------------------------|-------------------------------------------------------------------------------------------------------------------------------|-------------------------------------------------------------------|
| <i>mHPRT</i>                                                                                                                                                                                             | hypoxanthine guanine phosphoribosyl transferase 1                                                                             | 5'-GTTAAGCAGTACAGCCCCAAAATG-3',<br>5'-AAATCCAACAAAGTCTGGCCTGTA-3' |
| <i>mIL10</i>                                                                                                                                                                                             | interleukin 10                                                                                                                | 5'-TGAGGCGCTGTCATCGATTT-3',<br>5'-CATGGCCTTGTAGACACCTT-3'         |
| <i>mIL6</i>                                                                                                                                                                                              | interleukin 6                                                                                                                 | 5'-CCACGGCCTTCCCTACTTCA-3',<br>5'-TGCAAGTGCATCGTTGTTC-3'          |
| <i>mKC</i>                                                                                                                                                                                               | chemokine (C-X-C motif) ligand 1                                                                                              | 5'-GACCATGGCTGGGATTACACC-3',<br>5'-TCAGAAGCCAGCGTTCACCA-3'        |
| <i>mLcn2</i>                                                                                                                                                                                             | lipocalin 2                                                                                                                   | 5'-CCTCCATCCTGGTCAGGGAC-3',<br>5'-TAGTCCGTGGTGGCCACTTG-3'         |
| <i>mMrc1</i>                                                                                                                                                                                             | mannose receptor, C type 1                                                                                                    | 5'-TCTGGGCCATGAGGCTTCTC-3',<br>5'-CACGCAGCGCTTGTGATCTT-3'         |
| We generated Lcn2 or GFP expression plasmids by Gateway cloning after adding N- and C-terminal att-sites via PCR. We used pDONRTM201 as a shuttle vector. The destination vector was pCMV StreplIIHA GW. |                                                                                                                               |                                                                   |
| Primer name                                                                                                                                                                                              | Sequence (sense, antisense)                                                                                                   |                                                                   |
| <i>attB1 GFP</i>                                                                                                                                                                                         | 5'-GGGGACAAGTTTGTACAAAAAAGCAGGCTAGACTGCCATGGTGAGC<br>AAGGGC-3',<br>5'-GGGGACCACTTTGTACAAGAAAGCTGGGTTCTTGTACAGCTCGTCC<br>AT-3' |                                                                   |
| <i>attB1 Lcn2</i>                                                                                                                                                                                        | 5'-GGGGACAAGTTTGTACAAAAAAGCAGGCTAGACTGCCATGGCCCTG<br>AGTGTC-3',<br>5'-GGGGACCACTTTGTACAAGAAAGCTGGGTTGTTGTCAATGCATTGG<br>TC-3' |                                                                   |
